# Supplementary material
Source: PubMed Central journal article supplement (PMC9256796)
Supplement: NIHMS1802927-supplement-1.pdf [file NIHMS1802927-supplement-1.pdf]

## Supplementary Figure 1

**A**

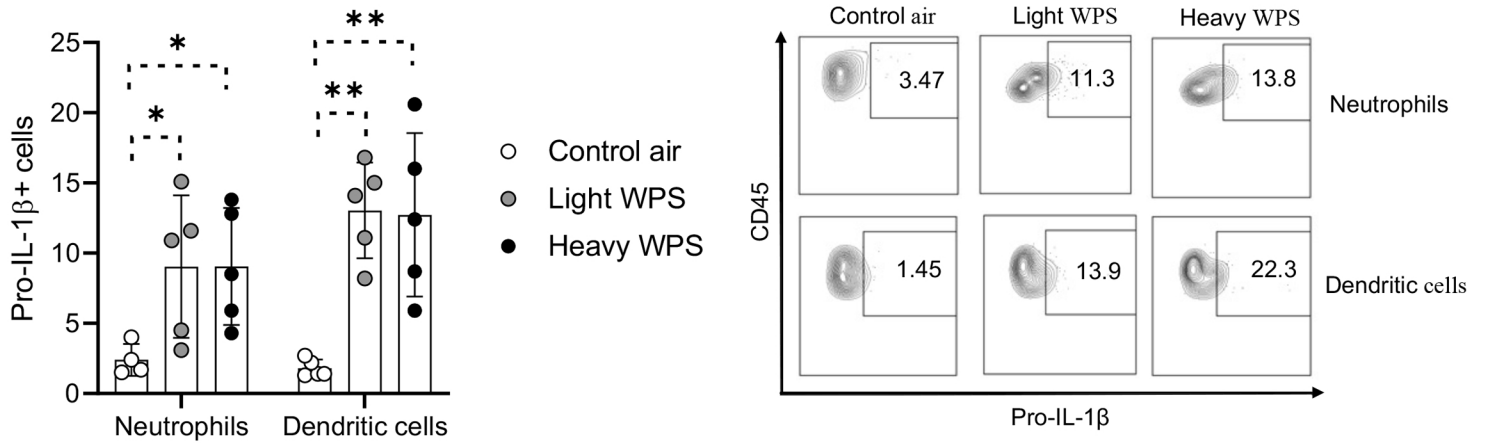

**B**

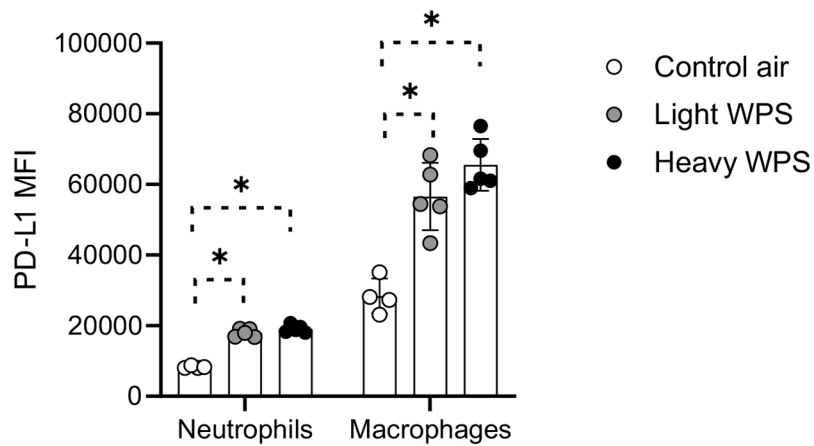

**Supplementary Figure 1. Exposure to WPS modulates host lung immune responses. A.** Flow cytometry analysis of Pro-IL-1 $\beta$  producing neutrophils and dendritic cells in lungs of mice following control air, light WPS, and heavy WPS exposures. **B.** Flow cytometry analysis of PD-L1 protein expression in neutrophils and macrophages from lungs of mice exposed to control air, light WPS, and heavy WPS. Differences were statistically assessed between the different exposure groups using Student's t test. \*, P < 0.05; \*\*, P < 0.01; \*\*\*, P < 0.001

## Supplementary Figure 2

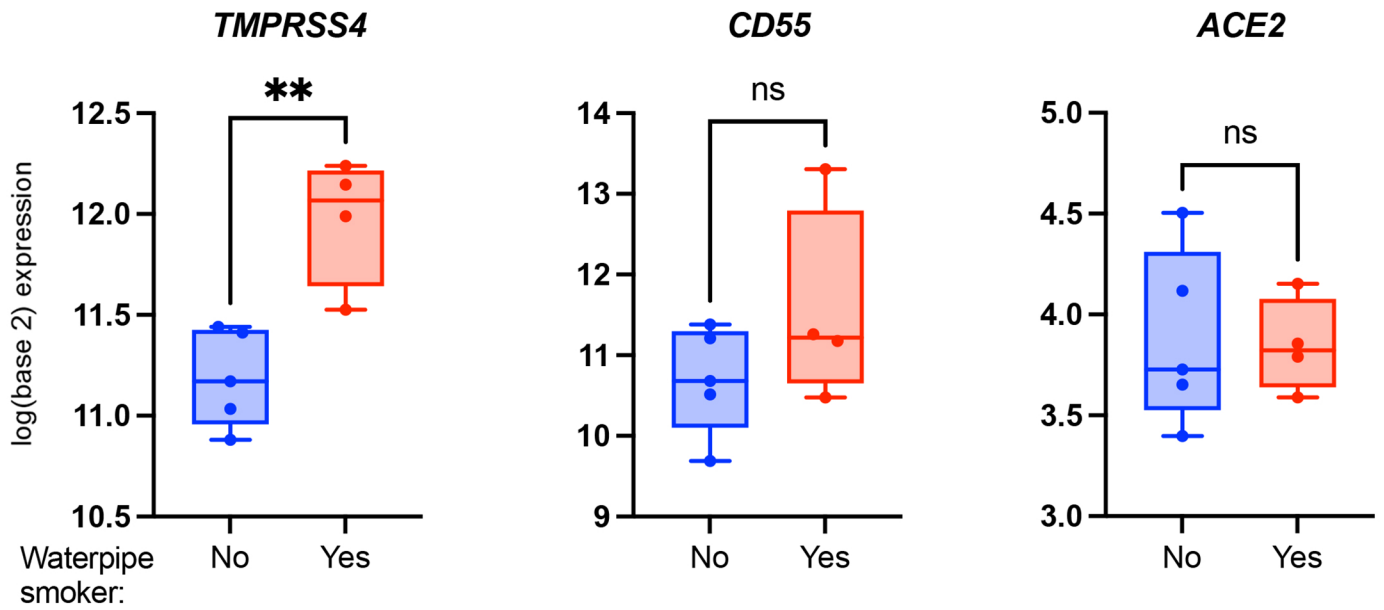

**Supplementary Figure 2. Waterpipe exposure elevates expression of receptors for the novel coronavirus SARS-CoV-2 in airway epithelia from bronchial brushings.** *TMPRSS4*, *CD55*, and *ACE2* mRNA expression levels were statistically compared between waterpipe non-smokers (blue) and waterpipe smokers (red) undergoing bronchoscopy. \*\*,  $P < 0.01$
